# Supplementary material for: Toxicity Index, patient-reported outcomes, and persistence of breast cancer chemotherapy-associated side effects in NRG Oncology/NSABP B-30
Source: PubMed Central journal article supplement (PMC9675799; doi:10.1038/s41523-022-00489-9), 2022-11-19
Supplement: 41523_2022_489_MOESM1_ESM.pdf [file 41523_2022_489_MOESM1_ESM.pdf]

## Supplementary Files

### Toxicity Index, patient-reported outcomes, and persistence of breast cancer chemotherapy-associated side effects in NRG Oncology/NSABP B-30

N. L. Henry, S. Kim, R. D. Hays, M. A. Diniz, M. Tighiouart, G. Gresham, M. Luu, R. S. Cecchini, G. Yothers, A. Rogatko, P. A. Ganz

#### Contents:

Supplementary Figure 1. Visual depiction of data timepoints that are included in the acute and subacute periods.

Supplementary Table 1. Comparison of baseline patient characteristics between participants with and without data in the subacute period.

Supplementary Table 2. Number of participants with one or more non-missing values for patient reported outcomes data, by cycle and study arm.

Supplementary Table 3. Multivariable Probabilistic Index Models (PIM) for the cumulative Toxicity Index (TI) for the pain domain during the acute and subacute time periods.

Supplementary Table 4. Multivariable PIM for the cumulative TI for pain domain individual items during the acute time period.

Supplementary Table 5. Multivariable PIM for the cumulative TI for pain domain individual items during the subacute time period.

Supplementary Table 6. Multivariable PIM for the cumulative TI for the cognitive domain during the acute and subacute time periods.

Supplementary Table 7. Multivariable PIM for the cumulative TI for cognitive domain individual items during the acute time period.

Supplementary Table 8. Multivariable PIM for the cumulative TI for cognitive domain individual items during the subacute time period.

Supplementary Table 9. Multivariable PIM for the cumulative TI for the vasomotor domain during the acute and subacute time periods.

Supplementary Table 10. Multivariable PIM for the cumulative TI for vasomotor domain individual items during the acute time period.

Supplementary Table 11. Multivariable PIM for the cumulative TI for vasomotor domain individual items during the subacute time period.

Supplementary Table 12. Multivariable PIM for the cumulative TI for the vaginal domain during the acute and subacute time periods.

Supplementary Table 13. Multivariable PIM for the cumulative TI for vaginal domain individual items during the acute time period.

Supplementary Table 14. Multivariable PIM for the cumulative TI for vaginal domain individual items during the subacute time period.

## Supplementary Figure 1

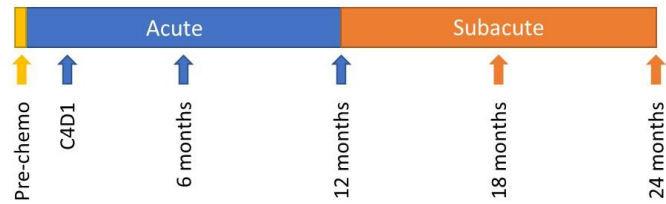

**Visual depiction of data timepoints that are included in the acute (blue) and subacute (orange) periods.** Patient-reported outcomes were completed at the 5 timepoints designated in blue and orange, and reflected the symptoms in the 7 days prior to each assessment.

**Supplementary Table 1. Comparison of baseline patient characteristics between participants with and without data in the subacute period.** Bolded p values reflect those that are <0.05. NH: Non-Hispanic

| Variable                                                                                                                                                                                                                            | All patients (N=2111) | Those with data in subacute period (N=1802) | Those without data in subacute period (N=309) | P-value          |
|-------------------------------------------------------------------------------------------------------------------------------------------------------------------------------------------------------------------------------------|-----------------------|---------------------------------------------|-----------------------------------------------|------------------|
| Age at surgery (Years), Median (IQR)                                                                                                                                                                                                | 49 (43 - 57)          | 50 (44 - 57)                                | 48 (42 - 56)                                  | 0.097            |
| Age at surgery (Years)                                                                                                                                                                                                              |                       |                                             |                                               | 0.292            |
| [24, 43]                                                                                                                                                                                                                            | 462 (21.89)           | 384 (21.31)                                 | 78 (25.24)                                    |                  |
| [43, 50]                                                                                                                                                                                                                            | 594 (28.14)           | 504 (27.97)                                 | 90 (29.13)                                    |                  |
| [50, 57]                                                                                                                                                                                                                            | 505 (23.92)           | 441 (24.47)                                 | 64 (20.71)                                    |                  |
| [57, 80]                                                                                                                                                                                                                            | 550 (26.05)           | 473 (26.25)                                 | 77 (24.92)                                    |                  |
| Race/Ethnicity <sup>1</sup>                                                                                                                                                                                                         |                       |                                             |                                               | 0.079            |
| NH White                                                                                                                                                                                                                            | 1817 (86.07)          | 1564 (86.79)                                | 253 (81.88)                                   |                  |
| Hispanic                                                                                                                                                                                                                            | 59 (2.79)             | 44 (2.44)                                   | 15 (4.85)                                     |                  |
| NH Black                                                                                                                                                                                                                            | 174 (8.24)            | 142 (7.88)                                  | 32 (10.36)                                    |                  |
| Other                                                                                                                                                                                                                               | 60 (2.84)             | 51 (2.83)                                   | 9 (2.91)                                      |                  |
| Unknown                                                                                                                                                                                                                             | 1 (0.05)              | 1 (0.06)                                    | 0 (0)                                         |                  |
| Body mass index (BMI; kg/m <sup>2</sup> )                                                                                                                                                                                           |                       |                                             |                                               | 0.913            |
| Underweight BMI < 18.5                                                                                                                                                                                                              | 24 (1.14)             | 20 (1.11)                                   | 4 (1.29)                                      |                  |
| Normal weight 18.5 ≤ BMI < 25                                                                                                                                                                                                       | 771 (36.52)           | 663 (36.79)                                 | 108 (34.95)                                   |                  |
| Overweight 25 ≤ BMI < 30                                                                                                                                                                                                            | 682 (32.31)           | 578 (32.08)                                 | 104 (33.66)                                   |                  |
| Obesity BMI ≥ 30                                                                                                                                                                                                                    | 634 (30.03)           | 541 (30.02)                                 | 93 (30.1)                                     |                  |
| Type of surgery                                                                                                                                                                                                                     |                       |                                             |                                               | 0.825            |
| Lumpectomy                                                                                                                                                                                                                          | 1078 (51.07)          | 922 (51.17)                                 | 156 (50.49)                                   |                  |
| Mastectomy                                                                                                                                                                                                                          | 1033 (48.93)          | 880 (48.83)                                 | 153 (49.51)                                   |                  |
| Hormonal therapy                                                                                                                                                                                                                    |                       |                                             |                                               | <b>&lt;0.001</b> |
| Yes                                                                                                                                                                                                                                 | 1672 (79.2)           | 1455 (80.74)                                | 217 (70.23)                                   |                  |
| No                                                                                                                                                                                                                                  | 439 (20.8)            | 347 (19.26)                                 | 92 (29.77)                                    |                  |
| Data are presented as number of patients (column %) or median (IQR, interquartile range). P-value is calculated by Wilcoxon rank-sum test for the continuous variable and chi-square test for categorical variables as appropriate. |                       |                                             |                                               |                  |
| <sup>1</sup> Unknown race/ethnicity is excluded from analyses.                                                                                                                                                                      |                       |                                             |                                               |                  |

**Supplementary Table 2. Number of participants with one or more non-missing values for patient reported outcomes data, by cycle and study arm A: doxorubicin; C: cyclophosphamide; QOL: quality of life; T: docetaxel**

|                                                   | <b>Total</b> | <b>AC -&gt; T</b> | <b>AT</b>  | <b>ATC</b> |
|---------------------------------------------------|--------------|-------------------|------------|------------|
| Participants included in the QOL substudy         | 2156         | 717               | 718        | 721        |
| Participants with follow-up questionnaires        | 2111         | 707               | 702        | 702        |
| Baseline                                          | 2111 (100)   | 707 (100)         | 702 (100)  | 702 (100)  |
| Day 1 of Cycle 4                                  | 1890 (89.5)  | 617 (87.3)        | 642 (91.5) | 631 (89.9) |
| 6-month follow-up                                 | 1764 (83.6)  | 595 (84.2)        | 587 (83.6) | 582 (82.9) |
| 12-month follow-up                                | 1686 (79.9)  | 558 (78.9)        | 555 (79.1) | 573 (81.6) |
| 18-month follow-up                                | 1551 (73.5)  | 523 (74.0)        | 507 (72.2) | 521 (74.2) |
| 24-month follow-up                                | 1571 (74.4)  | 521 (73.7)        | 523 (74.5) | 527 (75.1) |
| Data are presented as number of participants (%). |              |                   |            |            |

**Supplementary Table 3. Multivariable Probabilistic Index Models for the cumulative Toxicity Index (TI) for the pain domain during the acute and subacute time periods** Bolded p values reflect those that are <0.05. A: doxorubicin, BMI: body-mass index, C: cyclophosphamide, CI: confidence interval, NH: non-Hispanic, T: docetaxel.

| Variable                    | Comparison A < B <sup>1</sup>                     | Acute Period (N=2075)             |                      | Subacute Period (N=1791)          |                      |
|-----------------------------|---------------------------------------------------|-----------------------------------|----------------------|-----------------------------------|----------------------|
|                             |                                                   | Probability (95% CI) <sup>2</sup> | P-value <sup>2</sup> | Probability (95% CI) <sup>2</sup> | P-value <sup>3</sup> |
| Treatment <sup>4</sup>      | AT < ATC                                          | 0.505 (0.468, 0.541)              | 0.768                | 0.512 (0.471, 0.552)              | 0.489                |
|                             | AT < AC -> T                                      | 0.637 (0.599, 0.673)              | <b>&lt;0.001</b>     | 0.572 (0.531, 0.613)              | <b>&lt;0.001</b>     |
|                             | ATC < AC -> T                                     | 0.633 (0.595, 0.669)              | <b>&lt;0.001</b>     | 0.561 (0.519, 0.602)              | <b>0.001</b>         |
| TI at Baseline              | 1-unit increment                                  | 0.598 (0.587, 0.609)              | <b>&lt;0.001</b>     | 0.599 (0.587, 0.612)              | <b>&lt;0.001</b>     |
| Age at surgery (Years)      | 1-year increment                                  | 0.501 (0.499, 0.502)              | 0.351                | 0.503 (0.502, 0.505)              | <b>&lt;0.001</b>     |
| BMI (kg/m <sup>2</sup> )    | Obesity (BMI >= 30) < Underweight (BMI < 18.5)    | 0.48 (0.341, 0.623)               | 0.787                | 0.374 (0.236, 0.537)              | 0.128                |
|                             | Obesity (BMI >= 30) < Normal (18.5 <= BMI < 25)   | 0.452 (0.42, 0.484)               | <b>0.004</b>         | 0.406 (0.373, 0.441)              | <b>&lt;0.001</b>     |
|                             | Obesity (BMI >= 30) < Overweight (25 <= BMI < 30) | 0.475 (0.442, 0.507)              | 0.127                | 0.452 (0.418, 0.487)              | <b>0.007</b>         |
| Race/Ethnicity <sup>5</sup> | NH White < NH Black                               | 0.572 (0.52, 0.623)               | <b>0.007</b>         | 0.537 (0.478, 0.595)              | 0.224                |
|                             | NH White < Hispanic                               | 0.543 (0.464, 0.621)              | 0.287                | 0.458 (0.359, 0.56)               | 0.421                |
|                             | NH White < Other                                  | 0.512 (0.433, 0.59)               | 0.773                | 0.532 (0.446, 0.617)              | 0.462                |
| Type of surgery             | Lumpectomy < Mastectomy                           | 0.503 (0.477, 0.529)              | 0.820                | 0.537 (0.509, 0.564)              | <b>0.009</b>         |
| Endocrine therapy           | No < Yes                                          | N/A                               |                      | 0.51 (0.474, 0.546)               | 0.585                |

<sup>1</sup> Comparison A < B denotes the probability that the cumulative TI for B is higher than that for A

<sup>2</sup> Probability of 0.5 indicates no difference between comparisons (i.e., A=B)

<sup>3</sup> P values are calculated using the Wald statistic

<sup>4</sup> CI are adjusted for multiple tests for treatment using the Bonferroni procedure; p-values are adjusted for multiple tests for treatment using the Holm procedure

<sup>5</sup> Unknown race/ethnicity was excluded from analysis

**Supplementary Table 4. Multivariable Probabilistic Index Models for the cumulative Toxicity Index (TI) for pain domain individual items during the acute time period** Bolded p values reflect those that are <0.05. A: doxorubicin, C: cyclophosphamide, CI: confidence interval, NH: non-Hispanic, T: docetaxel.

| Variable                    | Comparison A < B <sup>1</sup> | Numbness (N=2067)                 |                      | General Aches and Pains (N=2066)  |                      | Joint Pains (N=2064)              |                      | Swelling of Hands or Feet (N=2066) |                      | Muscle Stiffness (N=2058)         |                      |
|-----------------------------|-------------------------------|-----------------------------------|----------------------|-----------------------------------|----------------------|-----------------------------------|----------------------|------------------------------------|----------------------|-----------------------------------|----------------------|
|                             |                               | Probability (95% CI) <sup>2</sup> | P-value <sup>3</sup> | Probability (95% CI) <sup>2</sup> | P-value <sup>3</sup> | Probability (95% CI) <sup>2</sup> | P-value <sup>3</sup> | Probability (95% CI) <sup>2</sup>  | P-value <sup>3</sup> | Probability (95% CI) <sup>2</sup> | P-value <sup>3</sup> |
| Treatment <sup>4</sup>      | AT < ATC                      | 0.533 (0.499, 0.567)              | <b>0.022</b>         | 0.502 (0.465, 0.539)              | 0.899                | 0.523 (0.486, 0.56)               | 0.263                | 0.508 (0.472, 0.543)               | 0.611                | 0.502 (0.465, 0.54)               | 0.877                |
|                             | AT < AC -> T                  | 0.691 (0.657, 0.722)              | <b>&lt;0.001</b>     | 0.556 (0.517, 0.593)              | <b>0.002</b>         | 0.544 (0.506, 0.582)              | <b>0.018</b>         | 0.585 (0.549, 0.621)               | <b>&lt;0.001</b>     | 0.587 (0.55, 0.623)               | <b>&lt;0.001</b>     |
|                             | ATC < AC -> T                 | 0.662 (0.626, 0.696)              | <b>&lt;0.001</b>     | 0.554 (0.515, 0.591)              | <b>0.002</b>         | 0.521 (0.482, 0.559)              | 0.263                | 0.578 (0.541, 0.614)               | <b>&lt;0.001</b>     | 0.585 (0.548, 0.621)              | <b>&lt;0.001</b>     |
| Symptom at Baseline         | 1-unit increment              | 0.598 (0.575, 0.62)               | <b>&lt;0.001</b>     | 0.636 (0.62, 0.65)                | <b>&lt;0.001</b>     | 0.658 (0.641, 0.674)              | <b>&lt;0.001</b>     | 0.641 (0.616, 0.665)               | <b>&lt;0.001</b>     | 0.609 (0.593, 0.624)              | <b>&lt;0.001</b>     |
| Age at surgery (Years)      | [57, 80] < [24, 43]           | 0.465 (0.430, 0.500)              | 0.051                | 0.488 (0.45, 0.525)               | 0.522                | 0.487 (0.45, 0.524)               | 0.478                | 0.496 (0.46, 0.533)                | 0.845                | 0.484 (0.448, 0.521)              | 0.395                |
|                             | [57, 80] < [43, 50]           | 0.472 (0.439, 0.505)              | 0.097                | 0.517 (0.483, 0.551)              | 0.330                | 0.524 (0.489, 0.559)              | 0.177                | 0.508 (0.475, 0.541)               | 0.636                | 0.494 (0.46, 0.528)               | 0.737                |
|                             | [57, 80] < [50, 57]           | 0.493 (0.458, 0.527)              | 0.685                | 0.513 (0.477, 0.549)              | 0.477                | 0.531 (0.495, 0.566)              | 0.092                | 0.525 (0.491, 0.559)               | 0.156                | 0.516 (0.482, 0.551)              | 0.358                |
| BMI (kg/m <sup>2</sup> )    | Obesity < Underweight         | 0.476 (0.358, 0.597)              | 0.700                | 0.475 (0.345, 0.609)              | 0.722                | 0.448 (0.329, 0.574)              | 0.420                | 0.333 (0.25, 0.428)                | <b>0.001</b>         | 0.505 (0.383, 0.627)              | 0.933                |
|                             | Obesity < Normal              | 0.458 (0.429, 0.489)              | <b>0.007</b>         | 0.456 (0.425, 0.488)              | <b>0.007</b>         | 0.469 (0.437, 0.502)              | 0.064                | 0.387 (0.358, 0.418)               | <b>&lt;0.001</b>     | 0.473 (0.442, 0.505)              | 0.096                |
|                             | Obesity < Overweight          | 0.48 (0.449, 0.512)               | 0.217                | 0.472 (0.439, 0.505)              | 0.092                | 0.484 (0.452, 0.517)              | 0.350                | 0.437 (0.406, 0.468)               | <b>&lt;0.001</b>     | 0.475 (0.443, 0.507)              | 0.120                |
| Race/Ethnicity <sup>5</sup> | NH White < NH Black           | 0.585 (0.538, 0.63)               | <b>&lt;0.001</b>     | 0.541 (0.492, 0.59)               | 0.101                | 0.522 (0.472, 0.573)              | 0.387                | 0.524 (0.473, 0.574)               | 0.363                | 0.535 (0.486, 0.583)              | 0.159                |
|                             | NH White < Hispanic           | 0.519 (0.451, 0.586)              | 0.586                | 0.534 (0.446, 0.621)              | 0.451                | 0.562 (0.476, 0.644)              | 0.159                | 0.458 (0.386, 0.532)               | 0.265                | 0.457 (0.379, 0.537)              | 0.291                |
|                             | NH White < Other              | 0.556 (0.484, 0.627)              | 0.128                | 0.474 (0.392, 0.556)              | 0.530                | 0.488 (0.41, 0.566)               | 0.759                | 0.467 (0.396, 0.538)               | 0.361                | 0.447 (0.376, 0.52)               | 0.156                |
| Type of surgery             | Lumpectomy < Mastectomy       | 0.517 (0.493, 0.541)              | 0.162                | 0.493 (0.467, 0.518)              | 0.585                | 0.502 (0.476, 0.527)              | 0.891                | 0.501 (0.477, 0.525)               | 0.942                | 0.496 (0.471, 0.521)              | 0.742                |

<sup>1</sup> Comparison A < B denotes the probability that the cumulative TI for B is higher than that for A

<sup>2</sup> Probability of 0.5 indicates no difference between comparisons (i.e., A=B)

<sup>3</sup> P values are calculated using the Wald statistic

<sup>4</sup> CI are adjusted for multiple tests for treatment using the Bonferroni procedure; p-values are adjusted for multiple tests for treatment using the Holm procedure

<sup>5</sup> Unknown race/ethnicity was excluded from analysis

**Supplementary Table 5. Multivariable Probabilistic Index Models for the cumulative Toxicity Index (TI) for pain domain individual items during the subacute time period** Bolded p values reflect those that are <0.05. A: doxorubicin, C: cyclophosphamide, CI: confidence interval, NH: non-Hispanic, T: docetaxel.

| Variable                    | Comparison A < B <sup>1</sup> | Numbness (N=1777)                 |                      | General Aches and Pains (N=1780)  |                      | Joint Pains (N=1783)              |                      | Swelling of Hands or Feet (N=1782) |                      | Muscle Stiffness (N=1776)         |                      |
|-----------------------------|-------------------------------|-----------------------------------|----------------------|-----------------------------------|----------------------|-----------------------------------|----------------------|------------------------------------|----------------------|-----------------------------------|----------------------|
|                             |                               | Probability (95% CI) <sup>2</sup> | P-value <sup>3</sup> | Probability (95% CI) <sup>2</sup> | P-value <sup>3</sup> | Probability (95% CI) <sup>2</sup> | P-value <sup>3</sup> | Probability (95% CI) <sup>2</sup>  | P-value <sup>3</sup> | Probability (95% CI) <sup>2</sup> | P-value <sup>3</sup> |
| Treatment <sup>4</sup>      | AT < ATC                      | 0.519 (0.483, 0.555)              | 0.207                | 0.506 (0.466, 0.547)              | 0.910                | 0.528 (0.488, 0.567)              | 0.158                | 0.504 (0.467, 0.542)               | 0.780                | 0.522 (0.482, 0.562)              | 0.374                |
|                             | AT < AC -> T                  | 0.598 (0.561, 0.635)              | <b>&lt;0.001</b>     | 0.519 (0.478, 0.56)               | 0.815                | 0.558 (0.517, 0.598)              | <b>0.002</b>         | 0.525 (0.487, 0.563)               | 0.352                | 0.542 (0.502, 0.582)              | <b>0.036</b>         |
|                             | ATC < AC -> T                 | 0.58 (0.541, 0.618)               | <b>&lt;0.001</b>     | 0.513 (0.472, 0.553)              | 0.910                | 0.531 (0.489, 0.572)              | 0.158                | 0.52 (0.482, 0.559)                | 0.405                | 0.52 (0.48, 0.56)                 | 0.374                |
| Symptom at baseline         | 1-unit increment              | 0.596 (0.571, 0.62)               | <b>&lt;0.001</b>     | 0.636 (0.619, 0.652)              | <b>&lt;0.001</b>     | 0.642 (0.624, 0.66)               | <b>&lt;0.001</b>     | 0.62 (0.594, 0.646)                | <b>&lt;0.001</b>     | 0.591 (0.574, 0.607)              | <b>&lt;0.001</b>     |
| Age at surgery (Years)      | [57, 80] < [24, 43]           | 0.443 (0.406, 0.48)               | <b>0.003</b>         | 0.434 (0.395, 0.473)              | <b>0.001</b>         | 0.426 (0.387, 0.467)              | <b>&lt;0.001</b>     | 0.483 (0.446, 0.52)                | 0.361                | 0.408 (0.37, 0.446)               | <b>&lt;0.001</b>     |
|                             | [57, 80] < [43, 50]           | 0.459 (0.424, 0.493)              | <b>0.019</b>         | 0.479 (0.442, 0.516)              | 0.274                | 0.484 (0.447, 0.522)              | 0.412                | 0.499 (0.464, 0.534)               | 0.946                | 0.469 (0.433, 0.505)              | 0.090                |
|                             | [57, 80] < [50, 57]           | 0.48 (0.444, 0.516)               | 0.270                | 0.501 (0.463, 0.539)              | 0.965                | 0.512 (0.474, 0.549)              | 0.540                | 0.538 (0.502, 0.573)               | <b>0.036</b>         | 0.526 (0.49, 0.563)               | 0.159                |
| BMI (kg/m <sup>2</sup> )    | Obesity < Underweight         | 0.475 (0.352, 0.601)              | 0.697                | 0.356 (0.238, 0.494)              | <b>0.041</b>         | 0.428 (0.287, 0.582)              | 0.359                | 0.385 (0.28, 0.503)                | 0.056                | 0.386 (0.252, 0.539)              | 0.142                |
|                             | Obesity < Normal              | 0.414 (0.383, 0.446)              | <b>&lt;0.001</b>     | 0.422 (0.388, 0.456)              | <b>&lt;0.001</b>     | 0.437 (0.403, 0.471)              | <b>&lt;0.001</b>     | 0.396 (0.365, 0.428)               | <b>&lt;0.001</b>     | 0.413 (0.38, 0.446)               | <b>&lt;0.001</b>     |
|                             | Obesity < Overweight          | 0.471 (0.438, 0.504)              | 0.082                | 0.459 (0.424, 0.493)              | <b>0.020</b>         | 0.471 (0.436, 0.506)              | 0.099                | 0.442 (0.409, 0.475)               | <b>0.001</b>         | 0.449 (0.416, 0.483)              | <b>0.003</b>         |
| Race/Ethnicity <sup>5</sup> | NH White < NH Black           | 0.509 (0.461, 0.557)              | 0.718                | 0.536 (0.48, 0.591)               | 0.212                | 0.493 (0.436, 0.549)              | 0.797                | 0.521 (0.468, 0.573)               | 0.441                | 0.505 (0.452, 0.559)              | 0.841                |
|                             | NH White < Hispanic           | 0.512 (0.432, 0.591)              | 0.769                | 0.476 (0.379, 0.575)              | 0.632                | 0.488 (0.387, 0.59)               | 0.818                | 0.447 (0.37, 0.525)                | 0.183                | 0.407 (0.324, 0.495)              | <b>0.038</b>         |
|                             | NH White < Other              | 0.518 (0.436, 0.6)                | 0.664                | 0.511 (0.415, 0.606)              | 0.829                | 0.488 (0.404, 0.573)              | 0.786                | 0.444 (0.378, 0.512)               | 0.106                | 0.446 (0.374, 0.519)              | 0.149                |
| Type of mastectomy          | Lumpectomy < Mastectomy       | 0.549 (0.524, 0.574)              | <b>&lt;0.001</b>     | 0.513 (0.485, 0.54)               | 0.356                | 0.533 (0.506, 0.56)               | <b>0.018</b>         | 0.527 (0.501, 0.552)               | <b>0.039</b>         | 0.521 (0.494, 0.548)              | 0.134                |



|                          |          |                      |       |                      |       |                      |       |                      |              |                     |       |
|--------------------------|----------|----------------------|-------|----------------------|-------|----------------------|-------|----------------------|--------------|---------------------|-------|
| <b>Endocrine therapy</b> | No < Yes | 0.493 (0.461, 0.525) | 0.683 | 0.491 (0.457, 0.525) | 0.604 | 0.522 (0.488, 0.555) | 0.209 | 0.533 (0.501, 0.564) | <b>0.043</b> | 0.526 (0.492, 0.56) | 0.128 |
|--------------------------|----------|----------------------|-------|----------------------|-------|----------------------|-------|----------------------|--------------|---------------------|-------|

<sup>1</sup> Comparison A < B denotes the probability that the cumulative TI for B is higher than that for A

<sup>2</sup> Probability of 0.5 indicates no difference between comparisons (i.e., A=B)

<sup>3</sup> P values are calculated using the Wald statistic

<sup>4</sup> CI are adjusted for multiple tests for treatment using the Bonferroni procedure; p-values are adjusted for multiple tests for treatment using the Holm procedure

<sup>5</sup> Unknown race/ethnicity was excluded from analysis

**Supplementary Table 6. Multivariable Probabilistic Index Models for the cumulative Toxicity Index (TI) for cognitive domain during the acute and subacute time periods** Bolded p values reflect those that are <0.05. A: doxorubicin, BMI: body-mass index, C: cyclophosphamide, CI: confidence interval, NH: non-Hispanic, T: docetaxel.

| Variable                    | Comparison A < B <sup>1</sup>                     | Acute Period (N=2078)             |                      | Subacute Period (N=1793)          |                      |
|-----------------------------|---------------------------------------------------|-----------------------------------|----------------------|-----------------------------------|----------------------|
|                             |                                                   | Probability (95% CI) <sup>2</sup> | P-value <sup>3</sup> | Probability (95% CI) <sup>2</sup> | P-value <sup>3</sup> |
| Treatment <sup>4</sup>      | AT < ATC                                          | 0.51 (0.471, 0.548)               | 1.000                | 0.52 (0.48, 0.56)                 | 0.694                |
|                             | AT < AC -> T                                      | 0.516 (0.477, 0.555)              | 0.964                | 0.517 (0.475, 0.559)              | 0.694                |
|                             | ATC < AC -> T                                     | 0.507 (0.468, 0.545)              | 1.000                | 0.497 (0.456, 0.539)              | 0.866                |
| TI at Baseline              | 1-unit increment                                  | 0.627 (0.615, 0.639)              | <b>&lt;0.001</b>     | 0.609 (0.596, 0.621)              | <b>&lt;0.001</b>     |
| Age at surgery (Years)      | 1-year increment                                  | 0.497 (0.495, 0.498)              | <b>&lt;0.001</b>     | 0.499 (0.497, 0.5)                | 0.118                |
| BMI (kg/m <sup>2</sup> )    | Obesity (BMI >= 30) < Underweight (BMI < 18.5)    | 0.443 (0.319, 0.576)              | 0.402                | 0.446 (0.319, 0.58)               | 0.428                |
|                             | Obesity (BMI >= 30) < Normal (18.5 <= BMI < 25)   | 0.487 (0.455, 0.519)              | 0.426                | 0.48 (0.446, 0.515)               | 0.261                |
|                             | Obesity (BMI >= 30) < Overweight (25 <= BMI < 30) | 0.497 (0.463, 0.53)               | 0.853                | 0.5 (0.465, 0.535)                | 0.989                |
| Race/Ethnicity <sup>5</sup> | NH White < NH Black                               | 0.523 (0.472, 0.573)              | 0.374                | 0.524 (0.469, 0.579)              | 0.397                |
|                             | NH White < Hispanic                               | 0.547 (0.457, 0.633)              | 0.310                | 0.467 (0.367, 0.57)               | 0.530                |
|                             | NH White < Other                                  | 0.435 (0.352, 0.521)              | 0.138                | 0.539 (0.444, 0.631)              | 0.424                |
| Type of surgery             | Lumpectomy < Mastectomy                           | 0.507 (0.481, 0.533)              | 0.581                | 0.505 (0.477, 0.532)              | 0.733                |
| Endocrine therapy           | No < Yes                                          | N/A                               |                      | 0.52 (0.485, 0.556)               | 0.263                |

<sup>1</sup> Comparison A < B denotes the probability that the cumulative TI for B is higher than that for A

<sup>2</sup> Probability of 0.5 indicates no difference between comparisons (i.e., A=B)

<sup>3</sup> P values are calculated using the Wald statistic

<sup>4</sup> CI are adjusted for multiple tests for treatment using the Bonferroni procedure; p-values are adjusted for multiple tests for treatment using the Holm procedure

<sup>5</sup> Unknown race/ethnicity was excluded from analysis

**Supplementary Table 7. Multivariable Probabilistic Index Models for the cumulative Toxicity Index (TI) for cognition domain individual items during the acute time period** Bolded p values reflect those that are <0.05. A: doxorubicin, C: cyclophosphamide, CI: confidence interval, NH: non-Hispanic, T: docetaxel.

| Variable                    | Comparison A < B <sup>1</sup> | Mood Swings (N=2070)              |                      | Forgetfulness (N=2072)            |                      | Difficulty Concentrating (N=2072) |                      |
|-----------------------------|-------------------------------|-----------------------------------|----------------------|-----------------------------------|----------------------|-----------------------------------|----------------------|
|                             |                               | Probability (95% CI) <sup>2</sup> | P-value <sup>3</sup> | Probability (95% CI) <sup>2</sup> | P-value <sup>3</sup> | Probability (95% CI) <sup>2</sup> | P-value <sup>3</sup> |
| Treatment <sup>4</sup>      | AT < ATC                      | 0.508 (0.470, 0.546)              | 0.812                | 0.504 (0.466, 0.542)              | 1.000                | 0.485 (0.447, 0.522)              | 0.656                |
|                             | AT < AC -> T                  | 0.521 (0.484, 0.559)              | 0.523                | 0.511 (0.473, 0.549)              | 1.000                | 0.507 (0.469, 0.546)              | 0.656                |
|                             | ATC < AC -> T                 | 0.513 (0.475, 0.551)              | 0.812                | 0.508 (0.470, 0.545)              | 1.000                | 0.523 (0.485, 0.560)              | 0.445                |
| Symptom at Baseline         | 1-unit increment              | 0.643 (0.629, 0.657)              | <b>&lt;0.001</b>     | 0.662 (0.646, 0.678)              | <b>&lt;0.001</b>     | 0.660 (0.644, 0.676)              | <b>&lt;0.001</b>     |
| Age at surgery (Years)      | [57, 80] < [24, 43)           | 0.596 (0.560, 0.632)              | <b>&lt;0.001</b>     | 0.547 (0.509, 0.585)              | <b>0.015</b>         | 0.537 (0.499, 0.574)              | 0.054                |
|                             | [57, 80] < [43, 50)           | 0.570 (0.536, 0.604)              | <b>&lt;0.001</b>     | 0.549 (0.515, 0.582)              | <b>0.005</b>         | 0.543 (0.509, 0.577)              | <b>0.013</b>         |
|                             | [57, 80] < [50, 57)           | 0.515 (0.480, 0.551)              | 0.393                | 0.531 (0.496, 0.566)              | 0.083                | 0.546 (0.511, 0.581)              | <b>0.010</b>         |
| BMI (kg/m <sup>2</sup> )    | Obesity < Underweight         | 0.444 (0.313, 0.583)              | 0.427                | 0.536 (0.418, 0.651)              | 0.549                | 0.450 (0.327, 0.580)              | 0.451                |
|                             | Obesity < Normal              | 0.471 (0.439, 0.503)              | 0.073                | 0.506 (0.474, 0.538)              | 0.711                | 0.505 (0.473, 0.537)              | 0.748                |
|                             | Obesity < Overweight          | 0.483 (0.45, 0.515)               | 0.299                | 0.512 (0.479, 0.544)              | 0.487                | 0.512 (0.479, 0.545)              | 0.465                |
| Race/Ethnicity <sup>5</sup> | NH White < NH Black           | 0.552 (0.503, 0.6)                | <b>0.038</b>         | 0.479 (0.430, 0.528)              | 0.397                | 0.455 (0.405, 0.506)              | 0.081                |
|                             | NH White < Hispanic           | 0.504 (0.428, 0.581)              | 0.910                | 0.518 (0.435, 0.600)              | 0.667                | 0.527 (0.442, 0.611)              | 0.536                |
|                             | NH White < Other              | 0.492 (0.414, 0.57)               | 0.840                | 0.436 (0.362, 0.513)              | 0.103                | 0.440 (0.366, 0.518)              | 0.13                 |
| Type of surgery             | Lumpectomy < Mastectomy       | 0.497 (0.472, 0.523)              | 0.822                | 0.499 (0.474, 0.525)              | 0.959                | 0.510 (0.484, 0.535)              | 0.451                |

<sup>1</sup> Comparison A < B denotes the probability that the cumulative TI for B is higher than that for A

<sup>2</sup> Probability of 0.5 indicates no difference between comparisons (i.e., A=B)

<sup>3</sup> P values are calculated using the Wald statistic

<sup>4</sup> CI are adjusted for multiple tests for treatment using the Bonferroni procedure; p-values are adjusted for multiple tests for treatment using the Holm procedure

<sup>5</sup> Unknown race/ethnicity was excluded from analysis

**Supplementary Table 8. Multivariable Probabilistic Index Models for the cumulative Toxicity Index (TI) for cognition domain individual items during the subacute time period** Bolded p values reflect those that are <0.05. A: doxorubicin, C: cyclophosphamide, CI: confidence interval, NH: non-Hispanic, T: docetaxel.

| Variable                    | Comparison A < B <sup>1</sup> | Mood Swings (N=1784)              |                      | Forgetfulness (N=1786)            |                      | Difficulty Concentrating (N=1790) |                      |
|-----------------------------|-------------------------------|-----------------------------------|----------------------|-----------------------------------|----------------------|-----------------------------------|----------------------|
|                             |                               | Probability (95% CI) <sup>2</sup> | P-value <sup>3</sup> | Probability (95% CI) <sup>2</sup> | P-value <sup>3</sup> | Probability (95% CI) <sup>2</sup> | P-value <sup>3</sup> |
| Treatment <sup>4</sup>      | AT < ATC                      | 0.518 (0.479, 0.557)              | 0.793                | 0.526 (0.487, 0.565)              | 0.346                | 0.503 (0.465, 0.542)              | 0.898                |
|                             | AT < AC -> T                  | 0.516 (0.476, 0.555)              | 0.793                | 0.521 (0.48, 0.562)               | 0.433                | 0.517 (0.477, 0.558)              | 0.898                |
|                             | ATC < AC -> T                 | 0.498 (0.458, 0.537)              | 0.886                | 0.495 (0.455, 0.536)              | 0.784                | 0.514 (0.474, 0.554)              | 0.898                |
| Symptom at baseline         | 1-unit increment              | 0.601 (0.586, 0.617)              | <b>&lt;0.001</b>     | 0.633 (0.617, 0.649)              | <b>&lt;0.001</b>     | 0.646 (0.63, 0.662)               | <b>&lt;0.001</b>     |
| Age at surgery (Years)      | [57, 80] < [24, 43]           | 0.576 (0.537, 0.613)              | <b>&lt;0.001</b>     | 0.478 (0.439, 0.518)              | 0.279                | 0.494 (0.456, 0.532)              | 0.760                |
|                             | [57, 80] < [43, 50]           | 0.544 (0.509, 0.579)              | <b>0.015</b>         | 0.506 (0.47, 0.542)               | 0.748                | 0.535 (0.499, 0.57)               | 0.056                |
|                             | [57, 80] < [50, 57]           | 0.525 (0.489, 0.561)              | 0.172                | 0.512 (0.475, 0.549)              | 0.514                | 0.525 (0.488, 0.561)              | 0.187                |
| BMI (kg/m <sup>2</sup> )    | Obesity < Underweight         | 0.5 (0.362, 0.639)                | 0.998                | 0.452 (0.328, 0.582)              | 0.468                | 0.444 (0.341, 0.553)              | 0.316                |
|                             | Obesity < Normal              | 0.474 (0.441, 0.507)              | 0.124                | 0.5 (0.466, 0.534)                | 1.000                | 0.487 (0.453, 0.521)              | 0.449                |
|                             | Obesity < Overweight          | 0.497 (0.463, 0.53)               | 0.845                | 0.517 (0.483, 0.55)               | 0.337                | 0.496 (0.462, 0.531)              | 0.836                |
| Race/Ethnicity <sup>5</sup> | NH White < NH Black           | 0.527 (0.476, 0.579)              | 0.297                | 0.508 (0.454, 0.561)              | 0.780                | 0.49 (0.438, 0.542)               | 0.708                |
|                             | NH White < Hispanic           | 0.497 (0.409, 0.584)              | 0.941                | 0.445 (0.357, 0.536)              | 0.237                | 0.458 (0.374, 0.546)              | 0.351                |
|                             | NH White < Other              | 0.523 (0.438, 0.607)              | 0.596                | 0.513 (0.424, 0.6)                | 0.781                | 0.509 (0.439, 0.579)              | 0.804                |
| Type of surgery             | Lumpectomy < Mastectomy       | 0.499 (0.473, 0.525)              | 0.935                | 0.502 (0.475, 0.529)              | 0.866                | 0.505 (0.479, 0.532)              | 0.706                |
| Endocrine therapy           | No < Yes                      | 0.482 (0.449, 0.516)              | 0.310                | 0.524 (0.489, 0.559)              | 0.171                | 0.521 (0.488, 0.555)              | 0.208                |

<sup>1</sup> Comparison A < B denotes the probability that the cumulative TI for B is higher than that for A

<sup>2</sup> Probability of 0.5 indicates no difference between comparisons (i.e., A=B)

<sup>3</sup> P values are calculated using the Wald statistic

<sup>4</sup> CI are adjusted for multiple tests for treatment using the Bonferroni procedure; p-values are adjusted for multiple tests for treatment using the Holm procedure

<sup>5</sup> Unknown race/ethnicity was excluded from analysis

**Supplementary Table 9. Multivariable Probabilistic Index Models for the cumulative Toxicity Index (TI) for the vasomotor domain during the acute and subacute time periods** Bolded p values reflect those that are <0.05. A: doxorubicin, BMI: body-mass index, C: cyclophosphamide, CI: confidence interval, NH: non-Hispanic, T: docetaxel.

| Variable                    | Comparison A < B <sup>1</sup>                     | Acute Period (N=2075)             |                      | Subacute Period (N=1791)          |                      |
|-----------------------------|---------------------------------------------------|-----------------------------------|----------------------|-----------------------------------|----------------------|
|                             |                                                   | Probability (95% CI) <sup>2</sup> | P-value <sup>3</sup> | Probability (95% CI) <sup>2</sup> | P-value <sup>3</sup> |
| Treatment <sup>4</sup>      | AT < ATC                                          | 0.568 (0.53, 0.606)               | <b>&lt;0.001</b>     | 0.577 (0.537, 0.616)              | <b>&lt;0.001</b>     |
|                             | AT < AC -> T                                      | 0.508 (0.469, 0.547)              | 0.617                | 0.545 (0.503, 0.585)              | <b>0.019</b>         |
|                             | ATC < AC -> T                                     | 0.439 (0.402, 0.478)              | <b>&lt;0.001</b>     | 0.467 (0.426, 0.508)              | 0.057                |
| TI at Baseline              | 1-unit increment                                  | 0.595 (0.585, 0.604)              | <b>&lt;0.001</b>     | 0.584 (0.573, 0.594)              | <b>&lt;0.001</b>     |
| Age at surgery (Years)      | 1-year increment                                  | 0.491 (0.489, 0.492)              | <b>&lt;0.001</b>     | 0.497 (0.496, 0.499)              | <b>0.001</b>         |
| BMI (kg/m <sup>2</sup> )    | Obesity (BMI >= 30) < Underweight (BMI < 18.5)    | 0.442 (0.345, 0.544)              | 0.262                | 0.317 (0.213, 0.443)              | <b>0.005</b>         |
|                             | Obesity (BMI >= 30) < Normal (18.5 <= BMI < 25)   | 0.514 (0.482, 0.546)              | 0.398                | 0.498 (0.464, 0.532)              | 0.917                |
|                             | Obesity (BMI >= 30) < Overweight (25 <= BMI < 30) | 0.54 (0.507, 0.572)               | <b>0.018</b>         | 0.528 (0.493, 0.562)              | 0.117                |
| Race/Ethnicity <sup>5</sup> | NH White < NH Black                               | 0.494 (0.443, 0.546)              | 0.826                | 0.519 (0.462, 0.575)              | 0.522                |
|                             | NH White < Hispanic                               | 0.444 (0.362, 0.529)              | 0.197                | 0.412 (0.315, 0.516)              | 0.095                |
|                             | NH White < Other                                  | 0.445 (0.368, 0.525)              | 0.174                | 0.517 (0.433, 0.599)              | 0.697                |
| Type of surgery             | Lumpectomy < Mastectomy                           | 0.504 (0.479, 0.53)               | 0.735                | 0.515 (0.487, 0.542)              | 0.302                |
| Endocrine therapy           | No < Yes                                          | N/A                               |                      | 0.656 (0.622, 0.688)              | <b>&lt;0.001</b>     |

<sup>1</sup> Comparison A < B denotes the probability that the cumulative TI for B is higher than that for A

<sup>2</sup> Probability of 0.5 indicates no difference between comparisons (i.e., A=B)

<sup>3</sup> P values are calculated using the Wald statistic

<sup>4</sup> CI are adjusted for multiple tests for treatment using the Bonferroni procedure; p-values are adjusted for multiple tests for treatment using the Holm procedure

<sup>5</sup> Unknown race/ethnicity was excluded from analysis

**Supplementary Table 10. Multivariable Probabilistic Index Models for the cumulative Toxicity Index (TI) for vasomotor domain individual items during the acute time period** Bolded p values reflect those that are <0.05. A: doxorubicin, C: cyclophosphamide, CI: confidence interval, NH: non-Hispanic, T: docetaxel.

| Variable                    | Comparison A < B <sup>1</sup> | Hot Flashes (N=2072)              |                      | Night Sweats (N=2069)             |                      |
|-----------------------------|-------------------------------|-----------------------------------|----------------------|-----------------------------------|----------------------|
|                             |                               | Probability (95% CI) <sup>2</sup> | P-value <sup>3</sup> | Probability (95% CI) <sup>2</sup> | P-value <sup>3</sup> |
| Treatment <sup>4</sup>      | AT < ATC                      | 0.573 (0.535, 0.61)               | <b>&lt;0.001</b>     | 0.571 (0.533, 0.608)              | <b>&lt;0.001</b>     |
|                             | AT < AC -> T                  | 0.515 (0.476, 0.553)              | 0.354                | 0.523 (0.484, 0.561)              | 0.160                |
|                             | ATC < AC -> T                 | 0.442 (0.404, 0.479)              | <b>&lt;0.001</b>     | 0.451 (0.414, 0.489)              | <b>0.004</b>         |
| Symptom at Baseline         | 1-unit increment              | 0.602 (0.59, 0.614)               | <b>&lt;0.001</b>     | 0.623 (0.609, 0.637)              | <b>&lt;0.001</b>     |
| Age at surgery (Years)      | [57, 80] < [24, 43]           | 0.673 (0.638, 0.706)              | <b>&lt;0.001</b>     | 0.68 (0.646, 0.713)               | <b>&lt;0.001</b>     |
|                             | [57, 80] < [43, 50]           | 0.722 (0.692, 0.75)               | <b>&lt;0.001</b>     | 0.72 (0.691, 0.748)               | <b>&lt;0.001</b>     |
|                             | [57, 80] < [50, 57]           | 0.636 (0.603, 0.669)              | <b>&lt;0.001</b>     | 0.639 (0.606, 0.671)              | <b>&lt;0.001</b>     |
| BMI (kg/m <sup>2</sup> )    | Obesity < Underweight         | 0.501 (0.378, 0.624)              | 0.989                | 0.463 (0.363, 0.566)              | 0.483                |
|                             | Obesity < Normal              | 0.518 (0.485, 0.55)               | 0.279                | 0.532 (0.5, 0.564)                | 0.050                |
|                             | Obesity < Overweight          | 0.541 (0.508, 0.573)              | <b>0.015</b>         | 0.537 (0.504, 0.57)               | <b>0.026</b>         |
| Race/Ethnicity <sup>5</sup> | NH White < NH Black           | 0.503 (0.452, 0.554)              | 0.894                | 0.493 (0.443, 0.543)              | 0.780                |
|                             | NH White < Hispanic           | 0.469 (0.388, 0.553)              | 0.474                | 0.442 (0.365, 0.521)              | 0.150                |
|                             | NH White < Other              | 0.444 (0.364, 0.527)              | 0.188                | 0.415 (0.347, 0.486)              | <b>0.019</b>         |
| Type of surgery             | Lumpectomy < Mastectomy       | 0.502 (0.477, 0.528)              | 0.857                | 0.503 (0.477, 0.529)              | 0.821                |

<sup>1</sup> Comparison A < B denotes the probability that the cumulative TI for B is higher than that for A

<sup>2</sup> Probability of 0.5 indicates no difference between comparisons (i.e., A=B)

<sup>3</sup> P values are calculated using the Wald statistic

<sup>4</sup> CI are adjusted for multiple tests for treatment using the Bonferroni procedure; p-values are adjusted for multiple tests for treatment using the Holm procedure

<sup>5</sup> Unknown race/ethnicity was excluded from analysis

**Supplementary Table 11. Multivariable Probabilistic Index Models for the cumulative Toxicity Index (TI) for vasomotor domain individual items during the subacute time period** Bolded p values reflect those that are <0.05. A: doxorubicin, C: cyclophosphamide, CI: confidence interval, NH: non-Hispanic, T: docetaxel.

| Variable                    | Comparison A < B <sup>1</sup> | Hot Flashes (N=1787)              |                      | Night Sweats (N=1786)             |                      |
|-----------------------------|-------------------------------|-----------------------------------|----------------------|-----------------------------------|----------------------|
|                             |                               | Probability (95% CI) <sup>2</sup> | P-value <sup>3</sup> | Probability (95% CI) <sup>2</sup> | P-value <sup>3</sup> |
| Treatment <sup>4</sup>      | AT < ATC                      | 0.582 (0.542, 0.621)              | <b>&lt;0.001</b>     | 0.56 (0.521, 0.599)               | <b>0.001</b>         |
|                             | AT < AC -> T                  | 0.559 (0.518, 0.6)                | <b>0.001</b>         | 0.536 (0.496, 0.575)              | 0.059                |
|                             | ATC < AC -> T                 | 0.477 (0.436, 0.518)              | 0.183                | 0.476 (0.436, 0.516)              | 0.145                |
| Symptom at baseline         | 1-unit increment              | 0.592 (0.579, 0.604)              | <b>&lt;0.001</b>     | 0.602 (0.588, 0.617)              | <b>&lt;0.001</b>     |
| Age at surgery (Years)      | [57, 80] < [24, 43]           | 0.515 (0.473, 0.556)              | 0.483                | 0.542 (0.503, 0.58)               | <b>0.034</b>         |
|                             | [57, 80] < [43, 50]           | 0.648 (0.613, 0.682)              | <b>&lt;0.001</b>     | 0.641 (0.606, 0.673)              | <b>&lt;0.001</b>     |
|                             | [57, 80] < [50, 57]           | 0.615 (0.578, 0.651)              | <b>&lt;0.001</b>     | 0.635 (0.6, 0.669)                | <b>&lt;0.001</b>     |
| BMI (kg/m <sup>2</sup> )    | Obesity < Underweight         | 0.378 (0.25, 0.526)               | 0.106                | 0.303 (0.203, 0.426)              | <b>0.002</b>         |
|                             | Obesity < Normal              | 0.509 (0.475, 0.543)              | 0.617                | 0.515 (0.481, 0.549)              | 0.386                |
|                             | Obesity < Overweight          | 0.534 (0.499, 0.568)              | 0.056                | 0.523 (0.489, 0.557)              | 0.185                |
| Race/Ethnicity <sup>5</sup> | NH White < NH Black           | 0.522 (0.467, 0.576)              | 0.428                | 0.523 (0.471, 0.575)              | 0.384                |
|                             | NH White < Hispanic           | 0.439 (0.347, 0.536)              | 0.215                | 0.45 (0.358, 0.546)               | 0.307                |
|                             | NH White < Other              | 0.499 (0.414, 0.584)              | 0.982                | 0.454 (0.378, 0.532)              | 0.245                |
| Type of surgery             | Lumpectomy < Mastectomy       | 0.51 (0.482, 0.537)               | 0.497                | 0.518 (0.491, 0.545)              | 0.190                |
| Endocrine therapy           | No < Yes                      | 0.66 (0.628, 0.691)               | <b>&lt;0.001</b>     | 0.625 (0.594, 0.656)              | <b>&lt;0.001</b>     |

<sup>1</sup> Comparison A < B denotes the probability that the cumulative TI for B is higher than that for A

<sup>2</sup> Probability of 0.5 indicates no difference between comparisons (i.e., A=B)

<sup>3</sup> P values are calculated using the Wald statistic

<sup>4</sup> CI are adjusted for multiple tests for treatment using the Bonferroni procedure; p-values are adjusted for multiple tests for treatment using the Holm procedure

<sup>5</sup> Unknown race/ethnicity was excluded from analysis

**Supplementary Table 12. Multivariable Probabilistic Index Models for the cumulative Toxicity Index (TI) for the vaginal domain during the acute and subacute time periods.** Bolded p values reflect those that are <0.05. A: doxorubicin, BMI: body-mass index, C: cyclophosphamide, CI: confidence interval, NH: non-Hispanic, T: docetaxel.

| Variable                    | Comparison A < B <sup>1</sup>                     | Acute (N=2068)                    |                      | Subacute (N=1791)                 |                      |
|-----------------------------|---------------------------------------------------|-----------------------------------|----------------------|-----------------------------------|----------------------|
|                             |                                                   | Probability (95% CI) <sup>2</sup> | P-value <sup>3</sup> | Probability (95% CI) <sup>2</sup> | P-value <sup>3</sup> |
| Treatment <sup>4</sup>      | AT < ATC                                          | 0.483 (0.447, 0.519)              | 0.642                | 0.521 (0.484, 0.558)              | 0.349                |
|                             | AT < AC -> T                                      | 0.502 (0.465, 0.538)              | 0.919                | 0.534 (0.497, 0.572)              | 0.085                |
|                             | ATC < AC -> T                                     | 0.519 (0.483, 0.554)              | 0.642                | 0.513 (0.475, 0.551)              | 0.405                |
| TI at Baseline              | 1-unit increment                                  | 0.635 (0.614, 0.655)              | <b>&lt;0.001</b>     | 0.626 (0.607, 0.645)              | <b>&lt;0.001</b>     |
| Age at surgery (Years)      | 1-year increment                                  | 0.497 (0.495, 0.498)              | <b>&lt;0.001</b>     | 0.498 (0.496, 0.499)              | <b>&lt;0.001</b>     |
| BMI (kg/m <sup>2</sup> )    | Obesity (BMI >= 30) < Underweight (BMI < 18.5)    | 0.503 (0.368, 0.637)              | 0.971                | 0.433 (0.311, 0.564)              | 0.318                |
|                             | Obesity (BMI >= 30) < Normal (18.5 <= BMI < 25)   | 0.554 (0.524, 0.584)              | <b>&lt;0.001</b>     | 0.544 (0.513, 0.576)              | <b>0.006</b>         |
|                             | Obesity (BMI >= 30) < Overweight (25 <= BMI < 30) | 0.544 (0.513, 0.574)              | <b>0.005</b>         | 0.529 (0.497, 0.56)               | 0.074                |
| Race/Ethnicity <sup>5</sup> | NH White < NH Black                               | 0.488 (0.442, 0.535)              | 0.613                | 0.44 (0.396, 0.485)               | <b>0.009</b>         |
|                             | NH White < Hispanic                               | 0.502 (0.429, 0.575)              | 0.950                | 0.469 (0.392, 0.548)              | 0.446                |
|                             | NH White < Other                                  | 0.433 (0.374, 0.495)              | <b>0.033</b>         | 0.508 (0.436, 0.579)              | 0.833                |
| Type of surgery             | Lumpectomy < Mastectomy                           | 0.504 (0.48, 0.528)               | 0.770                | 0.5 (0.475, 0.525)                | 0.997                |
| Endocrine therapy           | No < Yes                                          | N/A                               |                      | 0.525 (0.494, 0.557)              | 0.119                |

<sup>1</sup> Comparison A < B denotes the probability that the cumulative TI for B is higher than that for A

<sup>2</sup> Probability of 0.5 indicates no difference between comparisons (i.e., A=B)

<sup>3</sup> P values are calculated using the Wald statistic

<sup>4</sup> CI are adjusted for multiple tests for treatment using the Bonferroni procedure; p-values are adjusted for multiple tests for treatment using the Holm procedure

<sup>5</sup> Unknown race/ethnicity was excluded from analysis



**Supplementary Table 13. Multivariable Probabilistic Index Models for the cumulative Toxicity Index (TI) for vaginal domain individual items during the acute time period** Bolded p values reflect those that are <0.05. A: doxorubicin, C: cyclophosphamide, CI: confidence interval, NH: non-Hispanic, T: docetaxel.

| Variable                    | Comparison A < B <sup>1</sup> | Vaginal Dryness (N=2064)          |                      | Pain with Intercourse (N=1861)    |                      |
|-----------------------------|-------------------------------|-----------------------------------|----------------------|-----------------------------------|----------------------|
|                             |                               | Probability (95% CI) <sup>2</sup> | P-value <sup>3</sup> | Probability (95% CI) <sup>2</sup> | P-value <sup>3</sup> |
| Treatment <sup>4</sup>      | AT < ATC                      | 0.491 (0.456, 0.527)              | 1.000                | 0.486 (0.453, 0.519)              | 0.379                |
|                             | AT < AC -> T                  | 0.496 (0.46, 0.531)               | 1.000                | 0.518 (0.485, 0.552)              | 0.379                |
|                             | ATC < AC -> T                 | 0.504 (0.469, 0.54)               | 1.000                | 0.533 (0.499, 0.566)              | 0.063                |
| Symptom at Baseline         | 1-unit increment              | 0.642 (0.618, 0.665)              | <b>&lt;0.001</b>     | 0.669 (0.634, 0.702)              | <b>&lt;0.001</b>     |
| Age at surgery (Years)      | [57, 80] < [24, 43)           | 0.555 (0.52, 0.59)                | <b>0.002</b>         | 0.583 (0.551, 0.615)              | <b>&lt;0.001</b>     |
|                             | [57, 80] < [43, 50)           | 0.55 (0.518, 0.581)               | <b>0.002</b>         | 0.569 (0.54, 0.598)               | <b>&lt;0.001</b>     |
|                             | [57, 80] < [50, 57)           | 0.544 (0.511, 0.577)              | <b>0.008</b>         | 0.564 (0.532, 0.594)              | <b>&lt;0.001</b>     |
| BMI (kg/m <sup>2</sup> )    | Obesity < Underweight         | 0.526 (0.397, 0.652)              | 0.692                | 0.597 (0.474, 0.709)              | 0.120                |
|                             | Obesity < Normal              | 0.554 (0.524, 0.583)              | <b>&lt;0.001</b>     | 0.545 (0.517, 0.572)              | <b>0.001</b>         |
|                             | Obesity < Overweight          | 0.538 (0.508, 0.568)              | <b>0.012</b>         | 0.543 (0.516, 0.57)               | <b>0.002</b>         |
| Race/Ethnicity <sup>5</sup> | NH White < NH Black           | 0.499 (0.453, 0.545)              | 0.955                | 0.462 (0.424, 0.5)                | 0.051                |
|                             | NH White < Hispanic           | 0.504 (0.431, 0.577)              | 0.912                | 0.489 (0.423, 0.555)              | 0.736                |
|                             | NH White < Other              | 0.404 (0.347, 0.465)              | <b>0.002</b>         | 0.477 (0.414, 0.541)              | 0.475                |
| Type of surgery             | Lumpectomy < Mastectomy       | 0.504 (0.48, 0.527)               | 0.768                | 0.488 (0.466, 0.511)              | 0.307                |

<sup>1</sup> Comparison A < B denotes the probability that the cumulative TI for B is higher than that for A

<sup>2</sup> Probability of 0.5 indicates no difference between comparisons (i.e., A=B)

<sup>3</sup> P values are calculated using the Wald statistic

<sup>4</sup> CI are adjusted for multiple tests for treatment using the Bonferroni procedure; p-values are adjusted for multiple tests for treatment using the Holm procedure

<sup>5</sup> Unknown race/ethnicity was excluded from analysis

**Supplementary Table 14. Multivariable Probabilistic Index Models for the cumulative Toxicity Index (TI) for vaginal domain individual items during the subacute time period** Bolded p values reflect those that are <0.05. A: doxorubicin, C: cyclophosphamide, CI: confidence interval, NH: non-Hispanic, T: docetaxel.

| Variable                    | Comparison A < B <sup>1</sup> | Vaginal Dryness (N=1775)          |                      | Pain with Intercourse (N=1563)    |                      |
|-----------------------------|-------------------------------|-----------------------------------|----------------------|-----------------------------------|----------------------|
|                             |                               | Probability (95% CI) <sup>2</sup> | P-value <sup>3</sup> | Probability (95% CI) <sup>2</sup> | P-value <sup>3</sup> |
| Treatment <sup>4</sup>      | AT < ATC                      | 0.529 (0.493, 0.565)              | 0.140                | 0.521 (0.486, 0.556)              | 0.231                |
|                             | AT < AC -> T                  | 0.53 (0.494, 0.566)               | 0.140                | 0.545 (0.509, 0.58)               | <b>0.008</b>         |
|                             | ATC < AC -> T                 | 0.501 (0.464, 0.538)              | 0.940                | 0.524 (0.487, 0.561)              | 0.231                |
| Symptom at baseline         | 1-unit increment              | 0.623 (0.601, 0.645)              | <b>&lt;0.001</b>     | 0.645 (0.61, 0.678)               | <b>&lt;0.001</b>     |
| Age at surgery (Years)      | [57, 80] < [24, 43)           | 0.508 (0.473, 0.543)              | 0.644                | 0.564 (0.529, 0.598)              | <b>&lt;0.001</b>     |
|                             | [57, 80] < [43, 50)           | 0.552 (0.518, 0.585)              | <b>0.002</b>         | 0.568 (0.535, 0.6)                | <b>&lt;0.001</b>     |
|                             | [57, 80] < [50, 57)           | 0.538 (0.504, 0.572)              | <b>0.029</b>         | 0.535 (0.501, 0.567)              | <b>0.042</b>         |
| BMI (kg/m <sup>2</sup> )    | Obesity < Underweight         | 0.462 (0.342, 0.586)              | 0.550                | 0.528 (0.418, 0.635)              | 0.619                |
|                             | Obesity < Normal              | 0.545 (0.514, 0.575)              | <b>0.004</b>         | 0.548 (0.519, 0.578)              | <b>0.001</b>         |
|                             | Obesity < Overweight          | 0.527 (0.497, 0.558)              | 0.080                | 0.527 (0.498, 0.555)              | 0.072                |
| Race/Ethnicity <sup>5</sup> | NH White < NH Black           | 0.447 (0.404, 0.491)              | <b>0.019</b>         | 0.427 (0.389, 0.465)              | <b>&lt;0.001</b>     |
|                             | NH White < Hispanic           | 0.475 (0.405, 0.547)              | 0.495                | 0.485 (0.408, 0.563)              | 0.711                |
|                             | NH White < Other              | 0.472 (0.402, 0.544)              | 0.446                | 0.516 (0.443, 0.588)              | 0.674                |
| Type of surgery             | Lumpectomy < Mastectomy       | 0.503 (0.478, 0.527)              | 0.829                | 0.479 (0.455, 0.503)              | 0.090                |
| Endocrine therapy           | No < Yes                      | 0.515 (0.484, 0.545)              | 0.343                | 0.543 (0.513, 0.572)              | <b>0.004</b>         |

<sup>1</sup> Comparison A < B denotes the probability that the cumulative TI for B is higher than that for A

<sup>2</sup> Probability of 0.5 indicates no difference between comparisons (i.e., A=B)

<sup>3</sup> P values are calculated using the Wald statistic

<sup>4</sup> CI are adjusted for multiple tests for treatment using the Bonferroni procedure; p-values are adjusted for multiple tests for treatment using the Holm procedure

<sup>5</sup> Unknown race/ethnicity was excluded from analysis
